# Supplementary material for: Continuous synthesis of all-inorganic low-dimensional bismuth-based metal halides Cs4MnBi2Cl12 from reversible precursors Cs3BiCl6 and Cs3Bi2Cl9 under phase engineering
Source: Royal Society of Chemistry journal article supplement (doi:10.1039/d3tc01458d), 2023-01-01
Supplement: d3tc01458d1.pdf [file d3tc01458d1.pdf]

**Supporting Information**

**Continuous Synthesis of All-inorganic Low-dimensional Bismuth-based Metal Halides  $\text{Cs}_4\text{MnBi}_2\text{Cl}_{12}$  from Reversible Precursors  $\text{Cs}_3\text{BiCl}_6$  and  $\text{Cs}_3\text{Bi}_2\text{Cl}_9$  under Phase Engineering**

Chunli Zhao<sup>1</sup>, Yuan Gao<sup>1,2\*</sup>, Jianbei Qiu<sup>1,2\*</sup>

<sup>1</sup>*Faculty of Material Science and Engineering, Kunming University of Science and Technology, Kunming 650093, China*

<sup>2</sup>*Key Lab. of Advanced Materials of Yunnan Province, Kunming 650093, China*

**Corresponding Author**

\*E-mail: Yuan Gao (1251719335@qq.com); Jianbei Qiu (qiu@kust.edu.cn).

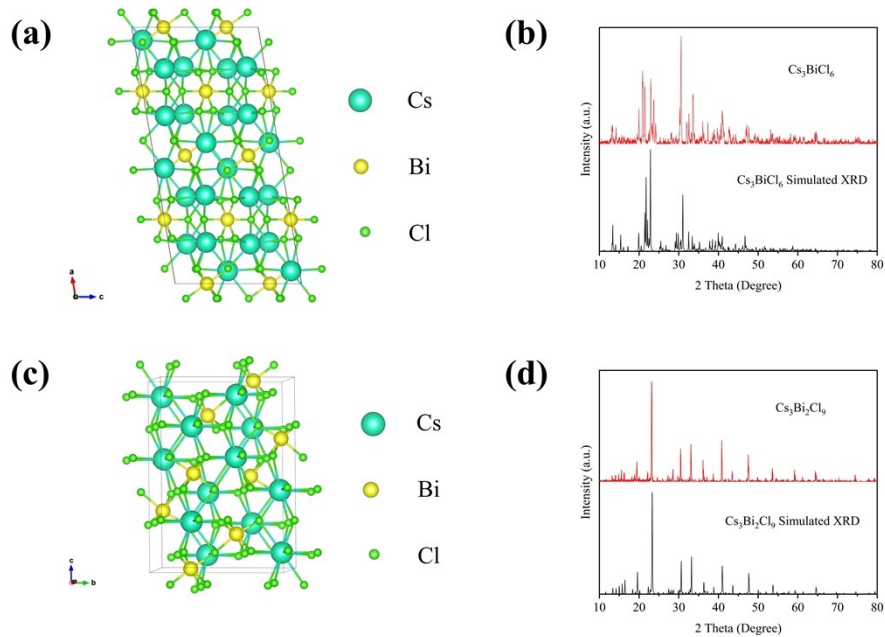

**Figure S1.** (a) Crystal structure of  $\text{Cs}_3\text{BiCl}_6$ . (b) XRD pattern of  $\text{Cs}_3\text{BiCl}_6$  compared to the simulated pattern (PDF#22-0171). (c) Crystal structure of  $\text{Cs}_3\text{Bi}_2\text{Cl}_9$ . (d) XRD pattern of  $\text{Cs}_3\text{Bi}_2\text{Cl}_9$  compared to the simulated pattern (PDF#70-0990).

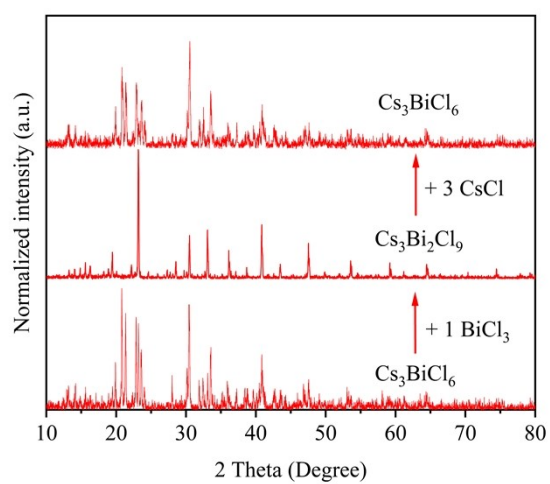

**Figure S2.** The XRD patterns of  $\text{Cs}_3\text{BiCl}_6$  / $\text{Cs}_3\text{Bi}_2\text{Cl}_9$  and their continuous phase transformation after adding CsCl and  $\text{BiCl}_3$ , respectively.

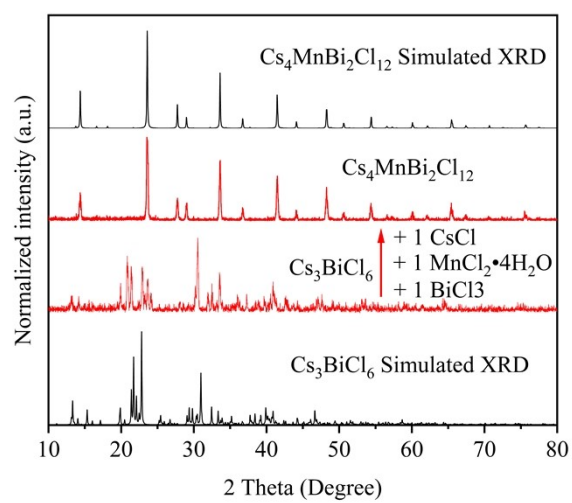

**Figure S3.** XRD patterns of  $\text{Cs}_3\text{BiCl}_6$  as precursor, after adding  $\text{CsCl} + \text{MnCl}_2 \cdot \text{H}_2\text{O} + \text{BiCl}_3$ , and synthesized  $\text{Cs}_4\text{MnBi}_2\text{Cl}_{12}$  phosphor.

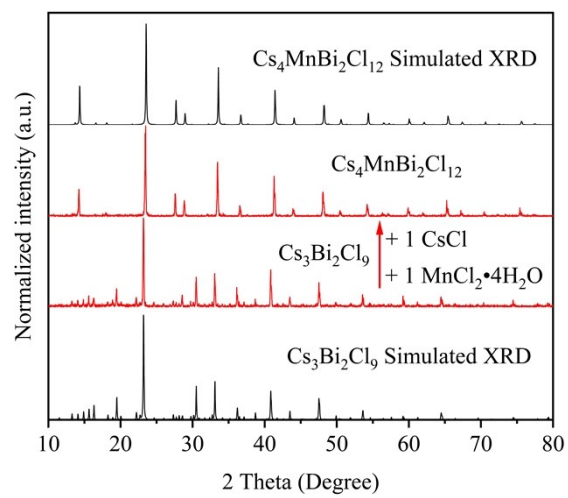

**Figure S4.** XRD patterns of  $\text{Cs}_3\text{Bi}_2\text{Cl}_9$  as precursor, after adding  $\text{CsCl}+\text{MnCl}_2 \cdot \text{H}_2\text{O}$ , and synthesized  $\text{Cs}_4\text{MnBi}_2\text{Cl}_{12}$  phosphor.

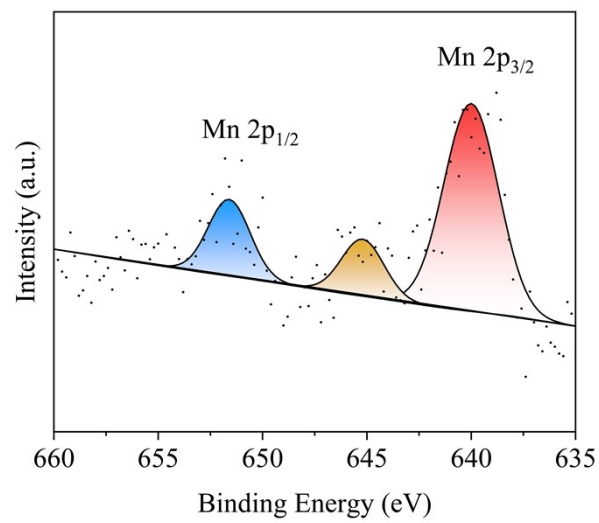

**Figure S5.** XPS spectra of Mn in Cs<sub>4</sub>MnBi<sub>2</sub>Cl<sub>12</sub> phosphor.

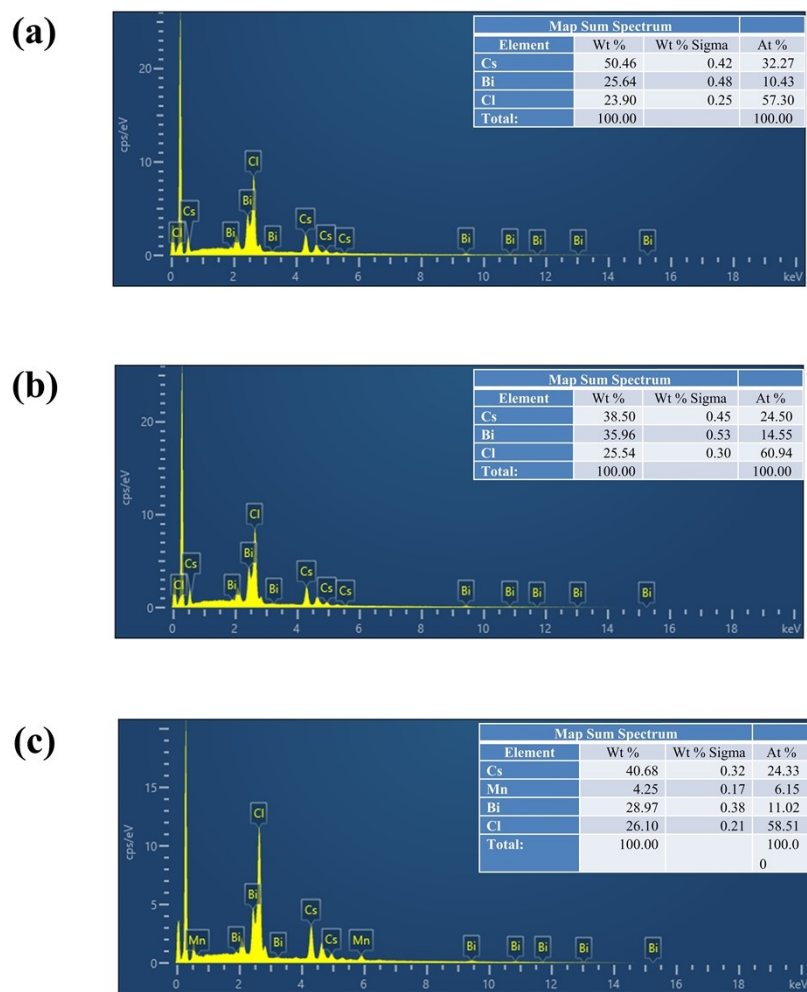

**Figure S6.** (a) The EDS spectrum of  $\text{Cs}_3\text{BiCl}_6$ . (b) The EDS spectrum of  $\text{Cs}_3\text{Bi}_2\text{Cl}_9$ . (c) The EDS spectrum of  $\text{Cs}_4\text{MnBi}_2\text{Cl}_{12}$ , respectively.

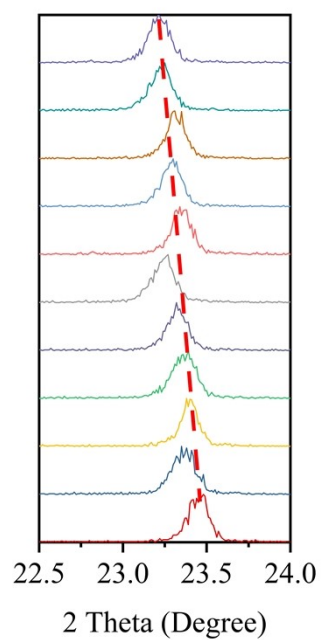

**Figure S7.** Selected diffraction peaks near  $23.5^\circ$  of  $\text{Cs}_4\text{Mn}_{1-x}\text{Cd}_x\text{Bi}_2\text{Cl}_{12}$  ( $x=0.0, 0.1, 0.2, 0.3, 0.4, 0.5, 0.6, 0.7, 0.8, 0.9, 1.0$ ).



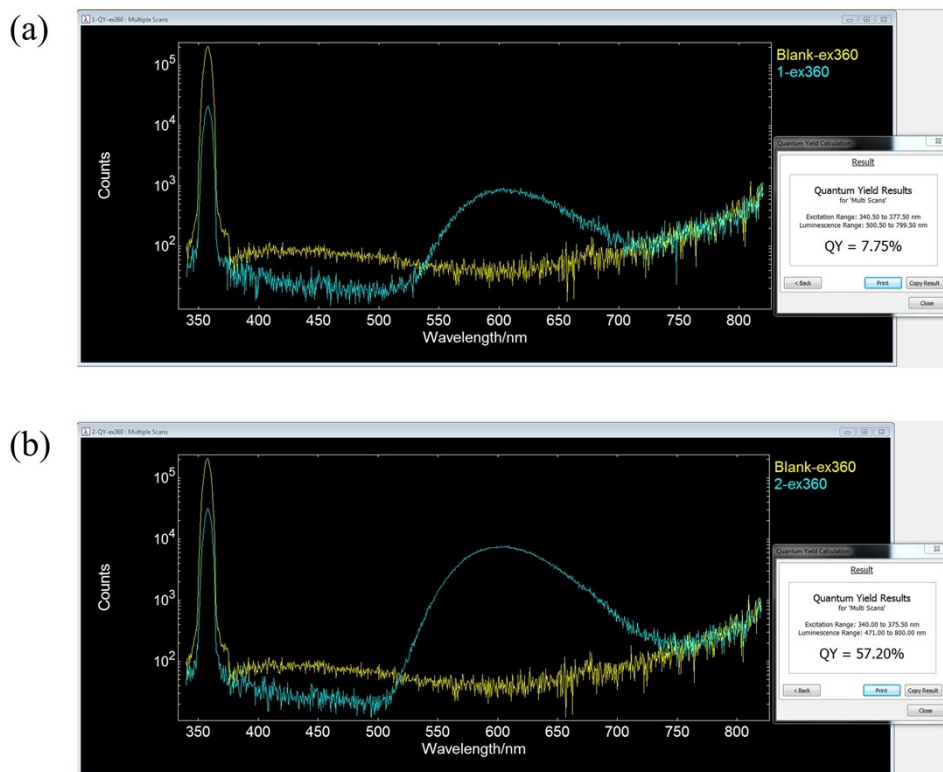

**Figure S8.** The measurement results of the optimal PLQY of (a)  $\text{Cs}_4\text{MnBi}_2\text{Cl}_{12}$  and (b)  $\text{Cs}_4\text{Mn}_{0.3}\text{Cd}_{0.7}\text{Bi}_2\text{Cl}_{12}$ .

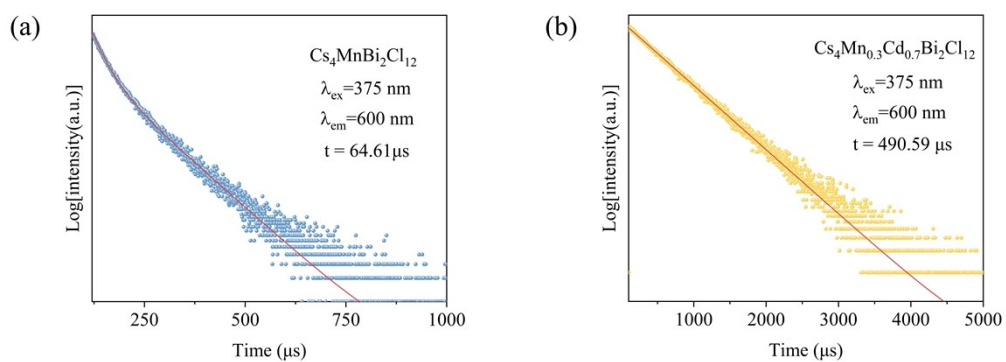

**Figure S9.** PL decay curves by monitoring Visible emission ( $\lambda_{\text{em}} = 950 \text{ nm}$ ) for the  $\text{Cs}_4\text{MnBi}_2\text{Cl}_{12}$  and  $\text{Cs}_4\text{Mn}_{0.3}\text{Cd}_{0.7}\text{Bi}_2\text{Cl}_{12}$  phosphor.

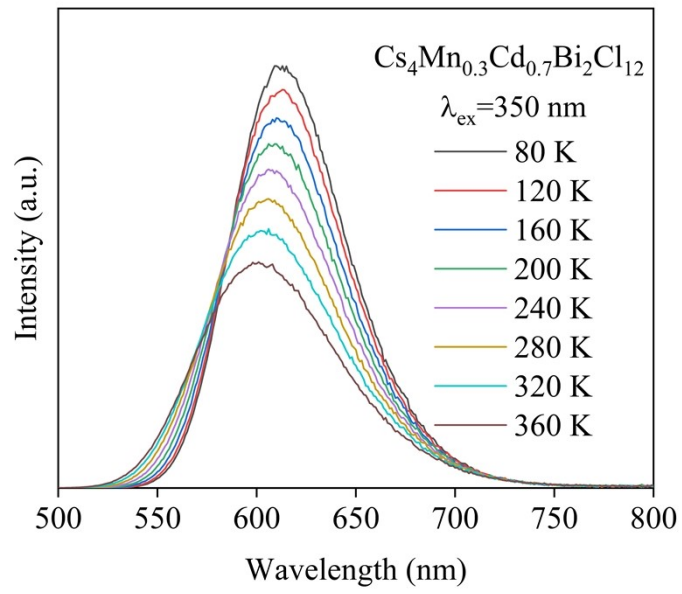

**Figure S10.** Temperature-dependent PL spectra for  $\text{Cs}_4\text{Mn}_{0.3}\text{Cd}_{0.7}\text{Bi}_2\text{Cl}_{12}$ .

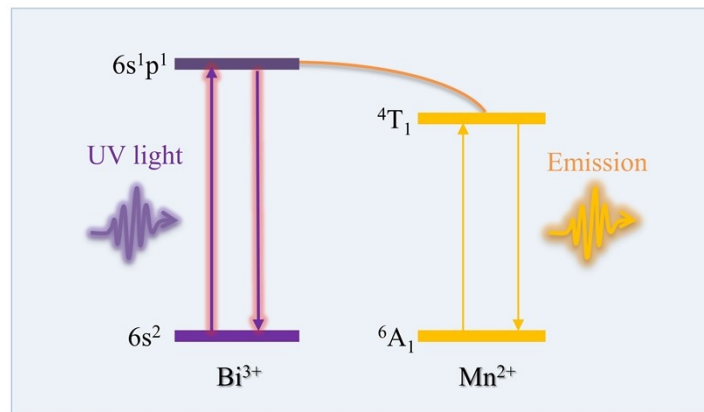

**Figure S11.** Schematic energy-level diagram illustrating the possible energy-transfer mechanism in Cs<sub>4</sub>Mn<sub>0.3</sub>Cd<sub>0.7</sub>Bi<sub>2</sub>Cl<sub>12</sub> sample under UV excitation.

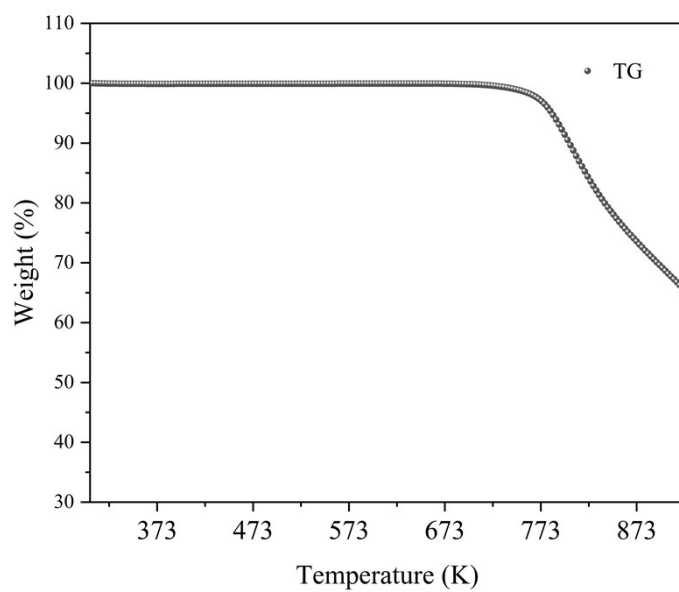

**Figure S12.** Thermogravimetric analysis graph of  $\text{Cs}_4\text{Mn}_{0.3}\text{Cd}_{0.7}\text{Bi}_2\text{Cl}_{12}$ .

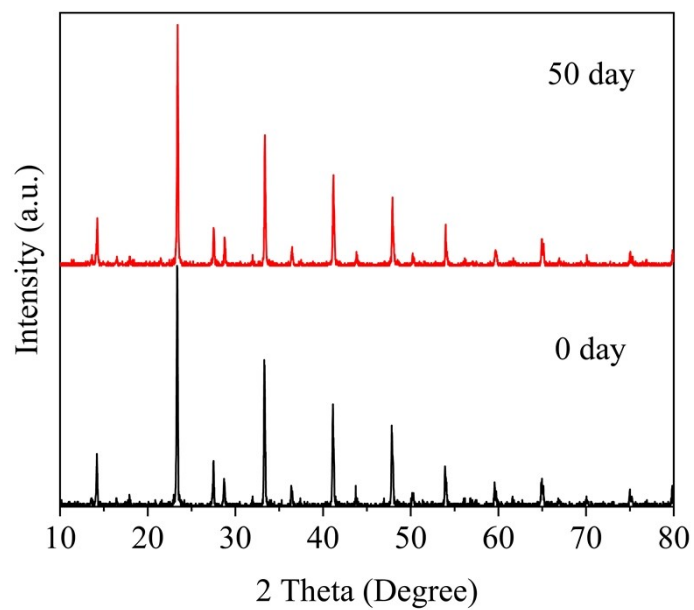

**Figure S13.** XRD patterns of the fresh  $\text{Cs}_4\text{Mn}_{0.3}\text{Cd}_{0.7}\text{Bi}_2\text{Cl}_{12}$  sample and after exposing in air for 50 days.

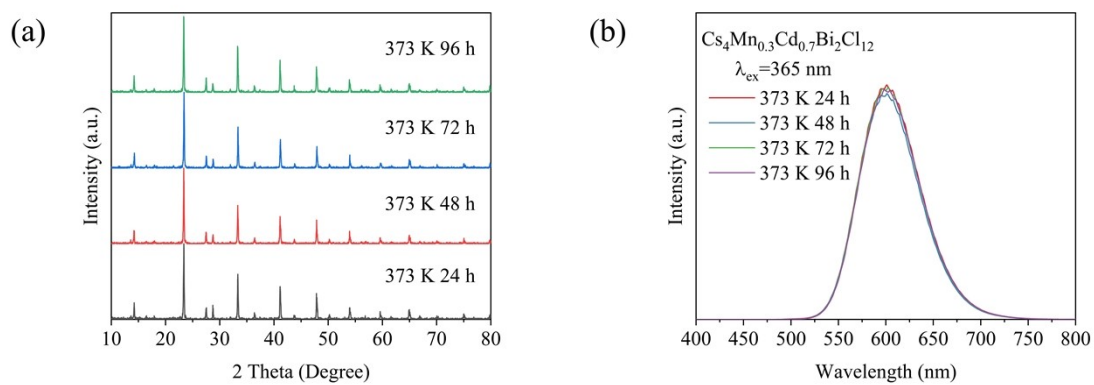

**Figure S14.** The (a) XRD patterns and (b) photoluminescence of thermal stability of the  $\text{Cs}_4\text{Mn}_{0.3}\text{Cd}_{0.7}\text{Bi}_2\text{Cl}_{12}$  under 373 K heat.
